# Supplementary material for: Concerns and adjustments: How the Portuguese population met COVID-19
Source: PubMed Central journal article supplement (PMC7556479; doi:10.1371/journal.pone.0240500), 2020-10-14
Supplement: pone.0240500.s001.pdf [file pone.0240500.s001.pdf]

**S1 Table** Survey questions: Social isolation, and concern

| Question                                                                                  | Number | %   |
|-------------------------------------------------------------------------------------------|--------|-----|
| <b>Are you in isolation / with social isolation measures implemented?</b>                 |        |     |
| No isolation measures implemented                                                         | 4,092  | 55% |
| With isolation measures implemented                                                       | 3,329  | 45% |
| No details on the type of isolation                                                       | 1,503  | 45% |
| Isolation determined by Health Authorities                                                | 80     | 2%  |
| Voluntary isolation                                                                       | 1,746  | 52% |
| No details on the type of voluntary isolation                                             | 845    | 48% |
| Never/ almost never leaves home                                                           | 585    | 34% |
| Leaves home with frequency (e.g. for work)                                                | 316    | 18% |
| <b>How concerned are you with the COVID-19 pandemic?</b>                                  |        |     |
| Not concerned                                                                             | 7      | 0%  |
| Not very concerned                                                                        | 66     | 1%  |
| Relatively concerned                                                                      | 1,058  | 14% |
| Very concerned                                                                            | 3,002  | 40% |
| Extremely concerned                                                                       | 3,315  | 45% |
| <b>How concerned are you with the COVID-19 pandemic impact in the Portuguese economy?</b> |        |     |
| Not concerned                                                                             | 31     | 0%  |
| Not very concerned                                                                        | 113    | 2%  |
| Relatively concerned                                                                      | 751    | 10% |
| Very concerned                                                                            | 2,654  | 36% |
| Extremely concerned                                                                       | 3,899  | 52% |

Note: Respondents were given the option not to answer particular questions.

% computed based on the number of answers to each question (excludes respondents who opted not to answer).  
7,448 valid answers recorded.
