# Supplementary material for: Concerns and adjustments: How the Portuguese population met COVID-19
Source: PubMed Central journal article supplement (PMC7556479; doi:10.1371/journal.pone.0240500), 2020-10-14
Supplement: pone.0240500.s002.pdf [file pone.0240500.s002.pdf]

**S2 Table** Survey questions: Stockpiling and consumption patterns

| Question                                                                                    | Number | %   |
|---------------------------------------------------------------------------------------------|--------|-----|
| <b>Did you stockpile groceries given the COVID-19 pandemic?</b>                             |        |     |
| Yes                                                                                         | 2,646  | 36% |
| No                                                                                          | 4,802  | 64% |
| <b>Where were those groceries purchased?</b>                                                |        |     |
| Online                                                                                      | 214    | 8%  |
| Neighbourhood market                                                                        | 173    | 7%  |
| Supermarket                                                                                 | 1,290  | 49% |
| Hypermarket                                                                                 | 969    | 37% |
| <b>How much have you spent on those groceries?</b>                                          |        |     |
| <50 euros                                                                                   | 640    | 25% |
| 51-100 euros                                                                                | 1,038  | 40% |
| 101-300 euros                                                                               | 764    | 29% |
| 301-500 euros                                                                               | 123    | 5%  |
| >501 euros                                                                                  | 32     | 1%  |
| <b>Have you had difficulties in finding goods in supermarkets (select all applicable)*?</b> |        |     |
| No                                                                                          | 259    | 48% |
| Yes                                                                                         | 286    | 52% |
| Yes - medicines                                                                             | 34     | 12% |
| Yes - hygiene products                                                                      | 122    | 43% |
| Yes - food supplies                                                                         | 191    | 67% |
| Yes - others                                                                                | 58     | 20% |

Note: Respondents were given the option not to answer particular questions.

% computed based on the number of answers to each question (excludes respondents who opted not to answer).

7,448 valid answers recorded.

\* Question only included in wave 2.
