# Supplementary material for: Concerns and adjustments: How the Portuguese population met COVID-19
Source: PubMed Central journal article supplement (PMC7556479; doi:10.1371/journal.pone.0240500), 2020-10-14
Supplement: pone.0240500.s003.pdf [file pone.0240500.s003.pdf]

**S3 Table** Survey questions: Health Services capacity

| Question                                                                                                  | Number | %   |
|-----------------------------------------------------------------------------------------------------------|--------|-----|
| <b>How do you perceive the quality of the health system since the beginning of the COVID-19 pandemic?</b> |        |     |
| I am not able to assess                                                                                   | 1,064  | 54% |
| Worsened substantially                                                                                    | 112    | 6%  |
| Worsened slightly                                                                                         | 196    | 10% |
| Remains equal                                                                                             | 476    | 24% |
| Improved slightly                                                                                         | 75     | 4%  |
| Improved substantially                                                                                    | 65     | 3%  |
| <b>Were any of your existing appointments changed (select all applicable)?</b>                            |        |     |
| I had no appointment(s) planned                                                                           | 1,105  | 56% |
| No, my appointments remained unchanged                                                                    | 91     | 5%  |
| Yes, my appointments were affected                                                                        | 792    | 40% |
| Changed to a remote appointment                                                                           | 49     | 6%  |
| Doctor appointment cancelled / postponed                                                                  | 602    | 76% |
| Surgery cancelled / postponed                                                                             | 30     | 4%  |
| Medical procedure cancelled / postponed                                                                   | 16     | 2%  |
| Other appointments cancelled / postponed                                                                  | 176    | 22% |
| <b>Where were your appointments (select all applicable)*?</b>                                             |        |     |
| NHS Hospital                                                                                              | 99     | 22% |
| NHS Primary Care                                                                                          | 112    | 25% |
| Private sector                                                                                            | 256    | 56% |
| Others                                                                                                    | 33     | 7%  |
| <b>Do you have any health insurance / health sub-system (select all applicable)?</b>                      |        |     |
| No                                                                                                        | 467    | 24% |
| Yes                                                                                                       | 1,510  | 76% |
| Yes, a health subsystem                                                                                   | 520    | 26% |
| Yes, health insurance provided by the employer                                                            | 448    | 23% |
| Yes, voluntary health insurance                                                                           | 643    | 33% |

Note: \*Type of service not recorded for consultations changed to remote. Respondents were given the option not to answer particular questions.  
 % computed based on the number of answers to each question (excludes respondents who opted not to answer).  
 1,988 valid answers recorded.  
 Questions not included in wave 1.
