# Supplementary material for: Concerns and adjustments: How the Portuguese population met COVID-19
Source: PubMed Central journal article supplement (PMC7556479; doi:10.1371/journal.pone.0240500), 2020-10-14
Supplement: pone.0240500.s004.pdf [file pone.0240500.s004.pdf]

**S4 Table** Survey questions: Economic consequences

| Question                                                                                  | Number | %   |
|-------------------------------------------------------------------------------------------|--------|-----|
| <b>Have you felt the impact from COVID-19 in your current financial situation?</b>        |        |     |
| No impact                                                                                 | 672    | 34% |
| Yes, positive impact                                                                      | 35     | 2%  |
| Small impact                                                                              | 9      | 26% |
| Moderate impact                                                                           | 18     | 51% |
| High impact                                                                               | 8      | 23% |
| Very high impact                                                                          | 0      | 0%  |
| Yes, negative impact                                                                      | 1,281  | 64% |
| Small impact                                                                              | 147    | 11% |
| Moderate impact                                                                           | 597    | 47% |
| High impact                                                                               | 379    | 30% |
| Very high impact                                                                          | 158    | 12% |
| <b>Do you expect to feel the impact from COVID-19 in your future financial situation?</b> |        |     |
| No impact                                                                                 | 292    | 15% |
| Yes, positive impact                                                                      | 46     | 2%  |
| Small impact                                                                              | 13     | 37% |
| Moderate impact                                                                           | 22     | 63% |
| High impact                                                                               | 7      | 20% |
| Very high impact                                                                          | 4      | 11% |
| Yes, negative impact                                                                      | 1,650  | 83% |
| Small impact                                                                              | 222    | 17% |
| Moderate impact                                                                           | 711    | 56% |
| High impact                                                                               | 496    | 39% |
| Very high impact                                                                          | 221    | 17% |

Note: Respondents were given the option not to answer particular questions.

% computed based on the number of answers to each question (excludes respondents who opted not to answer).

1,988 valid answers recorded.

Questions not included in wave 1.
